# Supplementary material
Source: Copernicus journal article supplement (doi:10.5194/egusphere-2026-2998)
Supplement: Supplementary file 1 [file egusphere-2026-2998-supplement.pdf]

## **Enhanced Carbon Sequestration in Alkaline Lakes through Recycled CO<sub>2</sub>**

### **Utilization by Diatoms**

Dinggui Wu<sup>1,2</sup>, Qingfeng Zhao<sup>1</sup>, Siyu Huang<sup>3</sup>, Yuxin He<sup>1</sup>, Jinglu Wu<sup>4</sup>, Yongge Sun<sup>1\*</sup>

<sup>1</sup>Organic Geochemistry Unit, School of Earth Sciences, Zhejiang University, Hangzhou 310027, China

<sup>2</sup>College of Oceanography, Hohai University, Nanjing 210024, China

<sup>3</sup>College of Environment and Resources, Guangxi Normal University, Guilin 541004, China

<sup>4</sup>State Key Laboratory of Lake Science and Environment, Nanjing Institute of Geography and Limnology, Chinese Academy of Sciences (CAS), Nanjing 210008, China.

\*Corresponding author. Yongge Sun ([ygsun@zju.edu.cn](mailto:ygsun@zju.edu.cn))

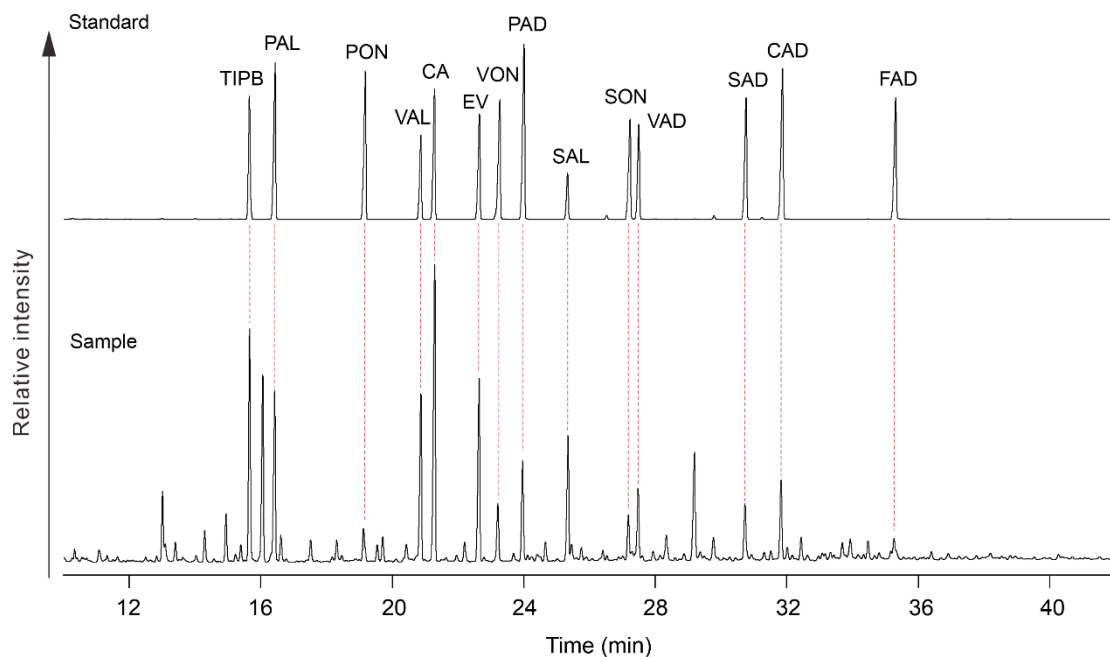

**Fig. S1.** Gas chromatograms of lignin-derived phenols in surface sediments from the Lake Haixihai compared with those of the standard compounds. Peaks from left to right are identified as 1,3,5-triisopropylbenzene (TIPB), *p*-hydroxybenzaldehyde (PAL), *p*-hydroxyacetophenone (PON), vanillin (VAL), trans-cinnamic acid (CA), ethyl vanillin (EV), acetovanillone (VON), *p*-hydroxybenzoic acid (PAD), syringaldehyde (SAL), acetosyringone (SON), vanillic acid (VAD), syringic acid (SAD), *p*-coumaric acid (CAD), and ferulic acid (FAD).

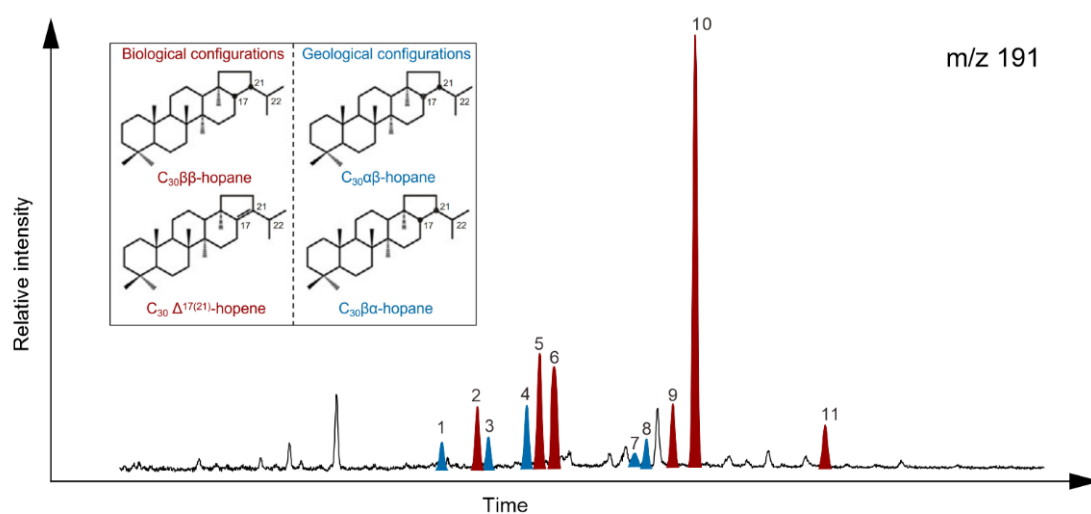

**Fig. S2.** Mass fragmentograms of triterpanes (m/z 191) in surface sediments from Lake Haixihai. 1: C<sub>29</sub> αβ-hopane, 17α(H), 21β(H)-30-norhopane. 2: hop-17(21)-ene. 3: C<sub>29</sub>βα-hopane, 17β(H), 21α(H)-30-normoretane. 4: C<sub>30</sub>αβ-hopane, 17α(H), 21β(H)-hopane. 5: hop-13(18)-ene. 6: C<sub>29</sub>ββ-hopane, 17β(H), 21β(H)-30-norhopane. 7: C<sub>31</sub>αβ-hopane, 17α(H), 21β(H)-homohopane (S). 8: C<sub>31</sub>αβ-hopane (R), 17α(H), 21β(H)-homohopane (R). 9: C<sub>30</sub>ββ-hopane, 17β(H), 21β(H)-hopane; 10: 17β(H)-hop-22(29)-ene (diploptene). 11: C<sub>31</sub>ββ-hopane, 17β(H), 21β(H)-homohopane.

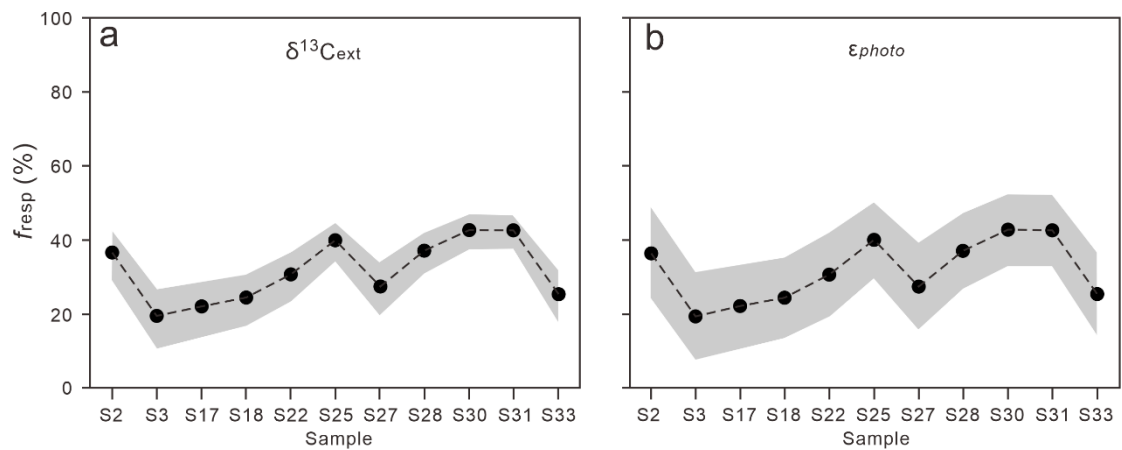

**Fig. S3.** Sensitivity of the estimated fraction of respired CO<sub>2</sub>(aq) assimilated by diatoms ( $f_{\text{resp}}$ ) to model parameters. Shown are Monte Carlo sensitivity analyses for (a) the isotopic composition of the external inorganic carbon endmember ( $\delta^{13}\text{C}_{\text{ext}}$ ), and (b) the effective photosynthetic fractionation factor ( $\epsilon_{\text{photo}}$ ). For each sensitivity test, one parameter was systematically varied across its prescribed range while the other two were randomly sampled within their respective ranges. Reported  $f_{\text{resp}}$  values correspond to medians across all samples, with 95% confidence intervals derived from the ensemble of simulations. Solid dark red lines indicate median values of  $f_{\text{resp}}$  across all samples, whereas shaded light red envelopes denote the 95% uncertainty intervals derived from Monte Carlo simulations.

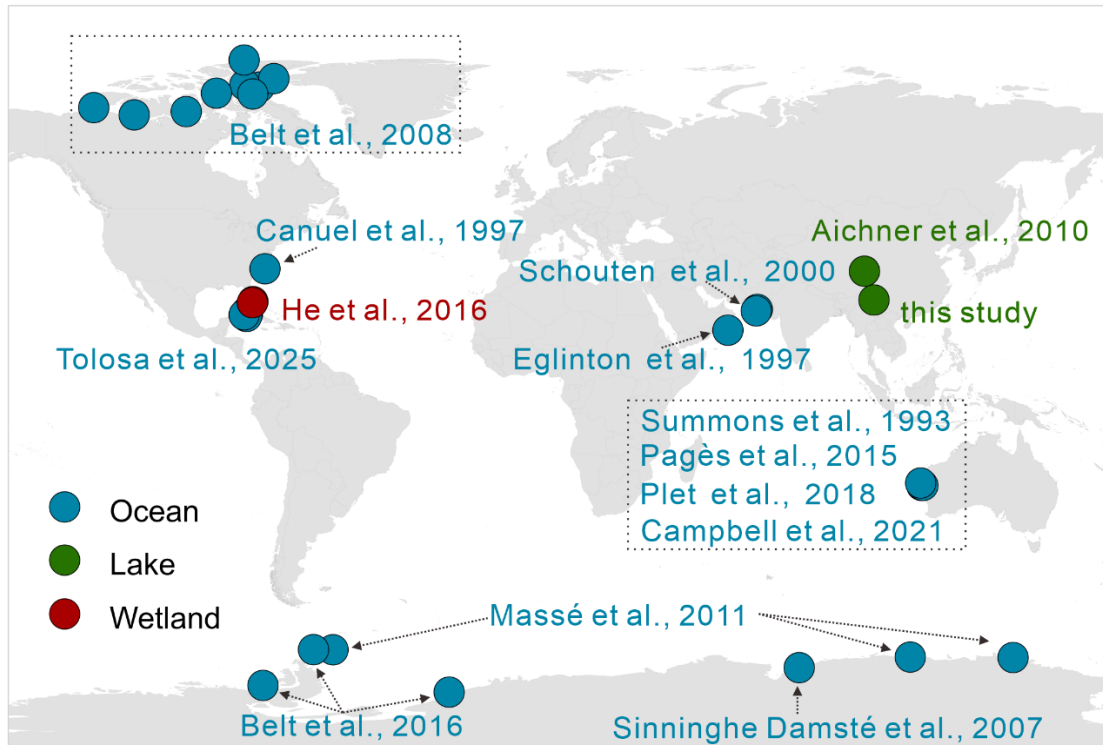

**Fig. S4.** Locations of the study sites compiled from the literature. Blue circles represent marine case studies, green circles represent lake case studies, and red circles represent wetland case studies.

**Table S1.** Compilation of stable carbon isotopic data of C<sub>25</sub> HBIs from different aquatic systems reported in the literature.

| Research region               | Aquatic system | Sample name                       | Longitude (°) | Altitude (°) | C <sub>25</sub> HBI type | δ <sup>13</sup> C | Reference             |
|-------------------------------|----------------|-----------------------------------|---------------|--------------|--------------------------|-------------------|-----------------------|
| Arabian Sea                   | Ocean          | Site 451                          | 66.06         | 23.68        | C25:0                    | -23.3             | Schouten et al., 2000 |
|                               |                | Site 453                          | 65.75         | 23.26        | C25:0                    | -21.7             |                       |
| Hamelin Pool                  | Ocean          | NA                                | 114.09        | -26.22       | C25:0                    | -11               | Summons et al., 1993  |
|                               |                | NA                                |               |              | C25:1                    | -12               |                       |
|                               |                | NA                                |               |              | C25:2                    | -12.8             |                       |
| Arabian Sea                   | Ocean          | Core 6BC                          | 57.51         | 17.81        | C25:2                    | -19.9             | Eglinton et al., 1997 |
| Outer Banks of North Carolina | Ocean          | CLB surface waters SPM 13 Sept 91 | -77.10        | 34.62        | C25:2                    | -20.32            | Canuel et al., 1997   |
|                               |                | CLB surf sediments 27 Feb 88      |               |              | C25:2                    | -22.2             |                       |
|                               |                | CLB surf sediments 2 Oct 88       |               |              | C25:2                    | -19.9             |                       |
| Arctic                        | Ocean          | NOW-1                             | -78.75        | 75.67        | C25:1                    | -16.9             | Belt et al., 2008     |
|                               |                | NOW-2                             | -82.97        | 76.18        | C25:1                    | -16.3             |                       |
|                               |                | ARC-1 0-1CM                       | -74.53        | 77.84        | C25:1                    | -21.7             |                       |
|                               |                | ARC-1 29-30CM                     |               |              | C25:1                    | -19.7             |                       |
|                               |                | ARC-2 0-1CM                       | -80.68        | 73.97        | C25:1                    | -20.2             |                       |
|                               |                | ARC-2 29-30CM                     |               |              | C25:2                    | -42.2             |                       |
|                               |                | ARC3 36-37CM                      | -91.23        | 74.16        | C25:1                    | -18.5             |                       |
|                               |                | ARC3 59-60 CM                     |               |              | C25:2                    | -18.2             |                       |
|                               |                | ARC3 109-110 CM                   |               |              | C25:1                    | -18.7             |                       |
|                               |                | ARC3 133-134 CM                   |               |              | C25:1                    | -18.4             |                       |
|                               |                | ARC3 230-231 CM                   |               |              | C25:1                    | -17.5             |                       |
|                               |                | ARC3 333-334 CM                   |               |              | C25:1                    | -18.9             |                       |
|                               |                | ARC3 333-334 CM                   |               |              | C25:1                    | -18.6             |                       |
|                               |                | ARC3 437-438 CM                   | C25:1         | -19.0        |                          |                   |                       |
|                               |                | ARC4 32-33 CM                     | -100.02       | 69.90        | C25:1                    | -18.7             |                       |
|                               |                | ARC4 61-62 CM                     |               |              | C25:2                    | -17               |                       |
|                               |                | ARC4 469-470 CM                   |               |              | C25:1                    | -23.2             |                       |
|                               |                | ARC4 469-470 CM                   | -115.14       | 69.16        | C25:1                    | -14.0             |                       |
|                               |                | ARC5 0-1CM                        |               |              | C25:1                    | -21.2             |                       |
|                               |                | ARC5 129-130CM                    |               |              | C25:1                    | -16.9             |                       |
| ARC5 408-409CM                | -126.91        | 70.79                             | C25:1         | -18.4        |                          |                   |                       |
| ARC-6                         |                |                                   | C25:1         | -23.2        |                          |                   |                       |
| Sediment trap                 |                |                                   | C25:1         | -19.6        |                          |                   |                       |
| Sea ice                       |                |                                   | C25:1         | -22.3        |                          |                   |                       |
| Batabanó Gulf                 | Ocean          | site-1                            | -82.22        | 22.62        | C25:1                    | -16.0             | Tolosa et al., 2025   |
|                               |                | site-3                            | -82.23        | 22.23        | C25:1                    | -9.7              |                       |
|                               |                | site-4                            | -82.43        | 22.10        | C25:1                    | -12.0             |                       |

|               |       |                        |        |        |       |        |                               |
|---------------|-------|------------------------|--------|--------|-------|--------|-------------------------------|
|               |       | site-5                 | -82.47 | 22.90  | C25:1 | -10.9  |                               |
|               |       | site-6                 | -82.47 | 21.69  | C25:1 | -12.5  |                               |
|               |       | site-9                 | -83.17 | 83.17  | C25:1 | -15.0  |                               |
|               |       | site-14                | -83.17 | 22.16  | C25:1 | -10.8  |                               |
| Ellis Fjord   | Ocean | 2-3CM                  | 78.23  | -68.60 | C25:2 | -9.1   | Sinninghe Damsté et al., 2007 |
|               |       | 6-7CM                  |        |        | C25:2 | -9.4   |                               |
| Antarctic     | Ocean | Weddell Sea 3          | -57.33 | -64.73 | C25:2 | -8.5   | Massé et al., 2011            |
|               |       | O'Brien Bay 1          | 110.54 | -66.29 | C25:2 | -5.7   |                               |
|               |       | MD130-MC02             | 140.42 | -66.40 | C25:2 | -17.8  |                               |
| Antarctic     | Ocean | Marguerite Bay (WAP)   | -63.02 | -64.70 | C25:2 | -15.0  | Belt et al., 2016             |
|               |       | SE Weddell Sea         | -23.55 | -74.21 | C25:2 | -13.5  |                               |
|               |       | The northern AP        | -77.70 | -72.61 | C25:2 | -14.4  |                               |
| Shark Bay     | Ocean | Smooth mat             | 113.85 | -26.37 | C25:1 | -12.6  | Plet et al., 2018             |
| Shark Bay     | Ocean | Black sludge           | 114.21 | -26.37 | C25:1 | -17.19 | Campbell et al., 2021         |
|               |       |                        |        |        | C25:0 | -16.6  |                               |
|               |       | Outer cobble section   | 114.21 | -26.37 | C25:1 | -15.1  |                               |
|               |       |                        |        |        | C25:0 | -16.6  |                               |
|               |       | Inner cobble section   | 114.21 | -26.38 | C25:1 | -14.6  |                               |
|               |       | Sludge between columns | 114.21 | -26.38 | C25:1 | -14.3  |                               |
|               |       |                        |        |        | C25:0 | -15.0  |                               |
|               |       | Tufted mat             | 114.21 | -26.38 | C25:1 | -13.6  |                               |
|               |       |                        |        |        | C25:0 | -13.7  |                               |
|               |       | Smooth mat             | 114.20 | -26.38 | C25:1 | -13.9  |                               |
|               |       |                        |        |        | C25:0 | -14.4  |                               |
|               |       | Ooze over sand         | 114.20 | -26.38 | C25:1 | -13.9  |                               |
| C25:0         | -14.4 |                        |        |        |       |        |                               |
| Shark Bay     | Ocean | microbial mat          | 113.54 | -25.70 | C25:1 | -15.2  | Pagès et al., 2015            |
| Lake Haixihai | Lake  | S2                     | 99.96  | 26.28  | C25:2 | -22.7  | this study                    |
|               |       | S27                    |        |        | C25:2 | -20.9  |                               |
|               |       | S3                     |        |        | C25:2 | -18.9  |                               |
|               |       | S33                    |        |        | C25:2 | -20.7  |                               |
|               |       | S17                    |        |        | C25:2 | -19.7  |                               |
|               |       | S18                    |        |        | C25:2 | -20.6  |                               |
|               |       | S22                    |        |        | C25:2 | -21.8  |                               |
|               |       | S25                    |        |        | C25:2 | -25.3  |                               |
|               |       | S31                    |        |        | C25:2 | -26.8  |                               |
|               |       | S28                    |        |        | C25:2 | -24.5  |                               |
|               |       | S30                    |        |        | C25:2 | -26.7  |                               |
| Lake Koucha   | Lake  | 0 cm                   | 97.20  | 34.00  | C25:2 | -21    | Aichner et al., 2010          |
|               |       | 23 cm                  |        |        | C25:2 | -22.7  |                               |
|               |       | 76 cm                  |        |        | C25:2 | -22.9  |                               |
|               |       | 96 cm                  |        |        | C25:2 | -21.1  |                               |
|               |       | 116 cm                 |        |        | C25:2 | -19.3  |                               |

|                             |         |                   |        |       |       |       |                 |
|-----------------------------|---------|-------------------|--------|-------|-------|-------|-----------------|
|                             |         | 124 cm            |        |       | C25:2 | -21.1 |                 |
|                             |         | 136 cm            |        |       | C25:2 | -24.6 |                 |
|                             |         | 156 cm            |        |       | C25:2 | -21.1 |                 |
|                             |         | 192 cm            |        |       | C25:2 | -20.9 |                 |
|                             |         | 204 cm            |        |       | C25:2 | -20.7 |                 |
|                             |         | 220 cm            |        |       | C25:2 | -19.3 |                 |
|                             |         | 253 cm            |        |       | C25:2 | -22.5 |                 |
| Everglades<br>National Park | Wetland | WCA3 periphyton   | -80.62 | 25.83 | C25:2 | -39.7 | He et al., 2016 |
|                             |         |                   |        |       | C25:3 | -40.0 |                 |
|                             |         | WCA3 ridge floc   |        |       | C25:2 | -39.3 |                 |
|                             |         |                   |        |       | C25:3 | -39.0 |                 |
|                             |         | WCA3 slough floc  |        |       | C25:2 | -39.7 |                 |
|                             |         |                   |        |       | C25:3 | -39.5 |                 |
|                             |         | WCA3 surface soil | C25:2  | -38.5 |       |       |                 |
|                             |         |                   | C25:3  | -39.1 |       |       |                 |
|                             |         | SRS2 floc         | -80.80 | 25.53 | C25:2 | -38.9 |                 |
|                             |         |                   |        |       | C25:3 | -39.3 |                 |

## References

- Aichner, B., Wilkes, H., Herzsuh, U., Mischke, S., & Zhang, C.J. 2010. Biomarker and compound-specific  $\delta^{13}\text{C}$  evidence for changing environmental conditions and carbon limitation at Lake Koucha, eastern Tibetan Plateau. *Journal of Paleolimnology* 43: 873-899. <https://doi.org/10.1007/s10933-009-9375-y>.
- Belt, S.T., Massé, G., Vare, L.L., Rowland, S.J., Poulin, M., Sicre, M.-A., Sampei, M., & Fortier, L. 2008. Distinctive  $^{13}\text{C}$  isotopic signature distinguishes a novel sea ice biomarker in Arctic sediments and sediment traps. *Marine Chemistry* 112: 158-167. <https://doi.org/https://doi.org/10.1016/j.marchem.2008.09.002>.
- Belt, S.T., Smik, L., Brown, T.A., Kim, J.H., Rowland, S.J., Allen, C.S., Gal, J.K., Shin, K.H., Lee, J.I., & Taylor, K.W.R. 2016. Source identification and distribution reveals the potential of the geochemical Antarctic sea ice proxy IPSO25. *Nature Communications* 7: 12655.

<https://doi.org/10.1038/ncomms12655>.

Campbell, M.A., Coolen, M.J.L., Visscher, P.T., Morris, T., & Grice, K. 2021.

Structure and function of Shark Bay microbial communities following tropical cyclone Olwyn: A metatranscriptomic and organic geochemical perspective.

*Geobiology* 19: 642-664. [https://doi.org/https://doi.org/10.1111/gbi.12461](https://doi.org/10.1111/gbi.12461).

Canuel, E.A., Freeman, K.H., & Wakeham, S.G. 1997. Isotopic compositions of lipid biomarker compounds in estuarine plants and surface sediments. *Limnology and Oceanography* 42: 1570-1583.

[https://doi.org/https://doi.org/10.4319/lo.1997.42.7.1570](https://doi.org/10.4319/lo.1997.42.7.1570).

Eglinton, T.I., Benitez-Nelson, B.C., Pearson, A., McNichol, A.P., Bauer, J.E., &

Druffel, E.R. 1997. Variability in radiocarbon ages of individual organic compounds from marine sediments. *Science* 277: 796-799.

He, D., Simoneit, B.R.T., Xu, Y.P., & Jaffé, R. 2016. Occurrence of unsaturated C<sub>25</sub>

highly branched isoprenoids (HBIs) in a freshwater wetland. *Organic*

*Geochemistry* 93: 59-67. <https://doi.org/10.1016/j.orggeochem.2016.01.006>.

Massé, G., Belt, S.T., Crosta, X., Schmidt, S., Snape, I., Thomas, D.N., & Rowland,

S.J. 2011. Highly branched isoprenoids as proxies for variable sea ice

conditions in the Southern Ocean. *Antarctic Science* 23: 487-498.

<https://doi.org/10.1017/S0954102011000381>.

Pagès, A., Grice, K., Welsh, D.T., Teasdale, P.T., Van Kranendonk, M.J., &

Greenwood, P. 2015. Lipid Biomarker and Isotopic Study of Community

Distribution and Biomarker Preservation in a Laminated Microbial Mat from

Shark Bay, Western Australia. *Microbial Ecology* 70: 459-472.

<https://doi.org/10.1007/s00248-015-0598-3>.

Plet, C., Pagès, A., Holman, A.I., Madden, R.H.C., & Grice, K. 2018. From supratidal to subtidal, an integrated characterisation of Carbla Beach shallow microbial mats (Hamelin Pool, Shark Bay, WA): Lipid biomarkers, stable carbon isotopes and microfibrils. *Chemical Geology* 493: 338-352.

<https://doi.org/https://doi.org/10.1016/j.chemgeo.2018.06.010>.

Schouten, S., Hoefs, M.J.L., & Sinninghe Damsté, J.S. 2000. A molecular and stable carbon isotopic study of lipids in late Quaternary sediments from the Arabian Sea. *Organic Geochemistry* 31: 509-521.

[https://doi.org/https://doi.org/10.1016/S0146-6380\(00\)00031-0](https://doi.org/https://doi.org/10.1016/S0146-6380(00)00031-0).

Sinninghe Damsté, J.S., Rijpstra, W.I.C., Coolen, M.J.L., Schouten, S., & Volkman, J.K. 2007. Rapid sulfurisation of highly branched isoprenoid (HBI) alkenes in sulfidic Holocene sediments from Ellis Fjord, Antarctica. *Organic Geochemistry* 38: 128-139.

<https://doi.org/https://doi.org/10.1016/j.orggeochem.2006.08.003>.

Summons, R.E., Barrow, R.A., Capon, R.J., Hope, J.M., & Stranger, C. 1993. The structure of a new C<sub>25</sub> isoprenoid alkene biomarker from diatomaceous microbial communities. *Australian Journal of Chemistry* 46: 907-915.

<https://doi.org/10.1071/ch9930907>.

Tolosa, I., Mesa-Albernas, M., & Alonso-Hernández, C.M. 2025. Assessing the sources of organic matter in sediments from the Gulf of Batabanó (Cuba)

using stable isotopes, aliphatic and polycyclic aromatic hydrocarbons.

*Continental Shelf Research* 285: 105405.

<https://doi.org/https://doi.org/10.1016/j.csr.2025.105405>.
